# Supplementary material for: Improving GENCODE reference gene annotation using a high-stringency proteogenomics workflow
Source: PubMed Central journal article supplement (PMC4895710; doi:10.1038/ncomms11778), 2016-06-02
Supplement: ncomms11778-s1.pdf [file ncomms11778-s1.pdf]

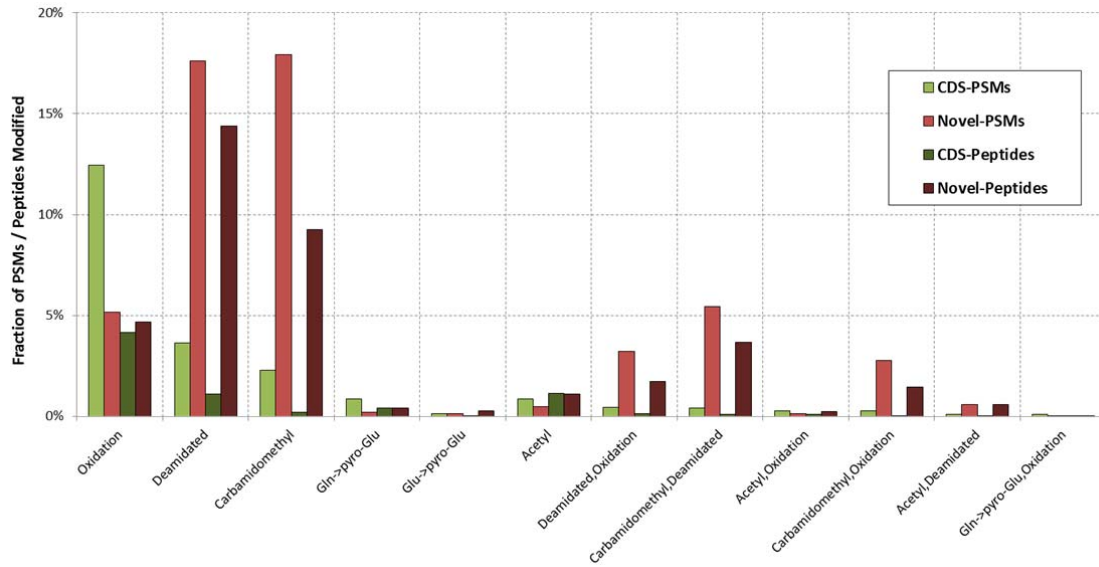

1

2 **Supplementary figure 1: PSM and Peptide Modification Rate Comparison between Known CDS**  
 3 **Proteins and Novels.** This plot shows the rate of occurrence of deamidation, oxidation, acetylation,  
 4 N-terminal carbamidomethylation, and pyro-Glu formation in the subsets of the PSM and peptide  
 5 results. This demonstrates a clear bias for deamidation and N-terminal carbamidomethylation in the  
 6 novel identifications. Based on this analysis we removed PSMs with these modifications from the  
 7 final novel analysis.

8

9

10

11

12

13

14

15

16

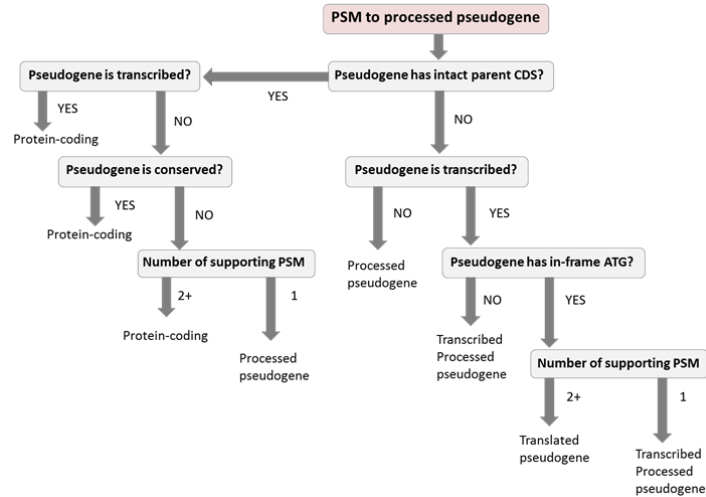

17

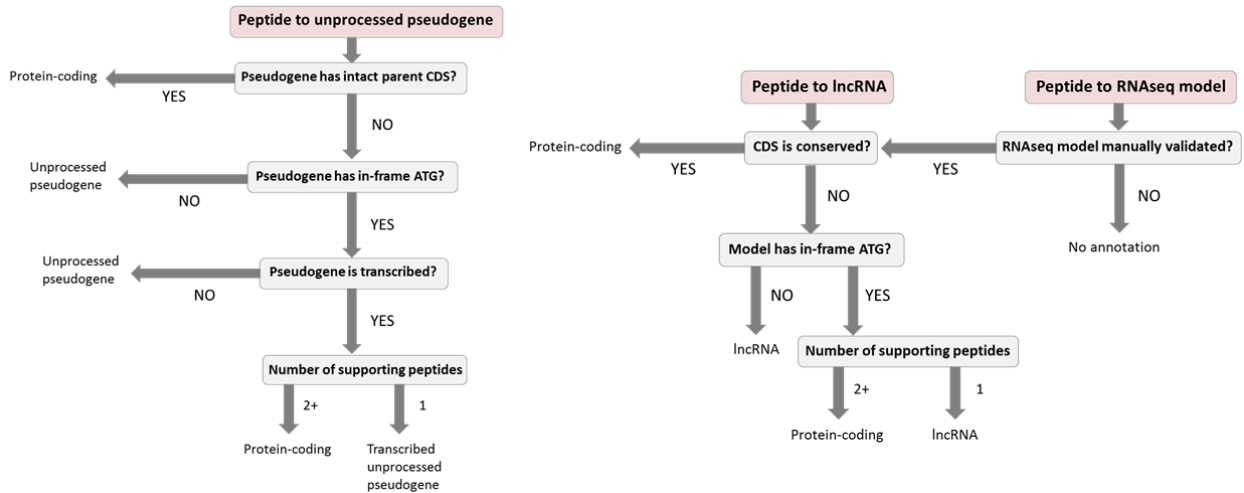

18

19 **Supplementary figure 2: Decision Trees for the Annotation of Potential Novel Protein-coding Loci,**  
 20 **Incorporating Mass Spectrometry Data.** This logic is now used by the HAVANA team, and it has  
 21 formed the basis for the analysis presented in this work. Only the core decisions are included, and  
 22 this workflow should be considered as overlaid on top of the full annotation guidelines of the  
 23 HAVANA project. Furthermore, in each scenario the supporting peptide identifications will be  
 24 reappraised as outlined in the Methods section; additional matches will be sought outside the  
 25 original search space, and for pseudogenes variation will be examined within the parent locus. For  
 26 pseudogenes, an examination of the transcriptional potential of the locus is a key part of the  
 27 decision-making process. At the present time, HAVANA judge pseudogene transcription solely based  
 28 on Sanger-sequenced evidence sets, i.e. cDNAs and ESTs. RNAseq datasets are not currently  
 29 appraised due to concerns about the potential for the mis-mapping of short reads between  
 30 paralogous loci. However, we anticipate that RNAseq datasets will become vital adjudicators of  
 31 pseudogene transcription in the near future as read lengths increase, e.g. based on the PacBio  
 32 sequencing platform. The pseudogene CDS is defined as ‘intact’ with regard to the parent locus  
 33 where the initiation and termination codons of the parent are found and the reading frame  
 34 maintained. A pseudogene or lncRNA-associated CDS is regarded as ‘conserved’ when an  
 35 orthologous CDS is found in other species, i.e. incorporating syntenic conservation. For human

36 annotation, HAVANA considers sequence conservation (including read-frame conservation) to be  
37 highly informative when it is displayed across a range of non-primate genomes. However,  
38 conservation may also be inferred within the primate lineage alone, provided supportive sequence  
39 data is available from a range of new world and old world monkey species. Conservation limited to  
40 ape genomes is not regarded as informative. In each scenario an 'in-frame ATG' is classed as an ATG  
41 found upstream of the peptide in the same reading frame, prior to a termination codon. In other  
42 words, the ATG could plausibly be used as an initiation codon to produce a translation that could  
43 explain the existence of the peptide. Our work found a single example of a unitary pseudogene  
44 (MYO15B), defined as a pseudogene that has vigorously defined protein-coding orthologues in other  
45 mammalian genomes. The annotation of mass spectrometry data for such cases essentially follows  
46 the decision tree for unprocessed pseudogenes, with 'unitary pseudogene' replacing the  
47 'unprocessed pseudogene' output as where appropriate.

48

49

50

51

52

53

54

55

56

57

58

59

60

61

62

63

64

65

66

**OTTHUMG00000021534 - Testis**

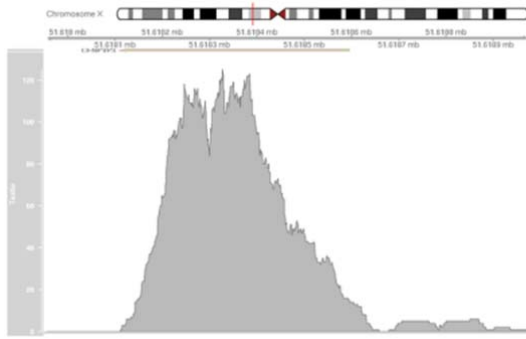

**OTTHUMG00000024197**

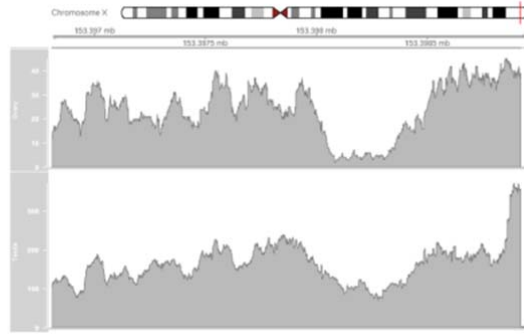

**OTTHUMG00000190648 - Testis**

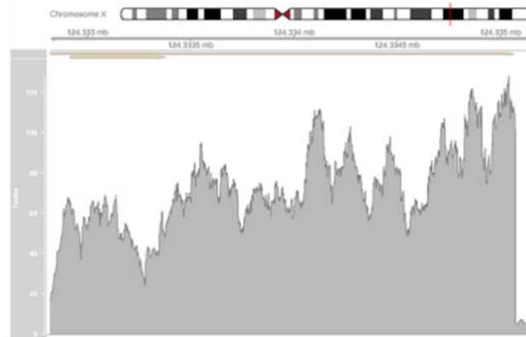

**OTTHUMG00000150367 - Tonsil**

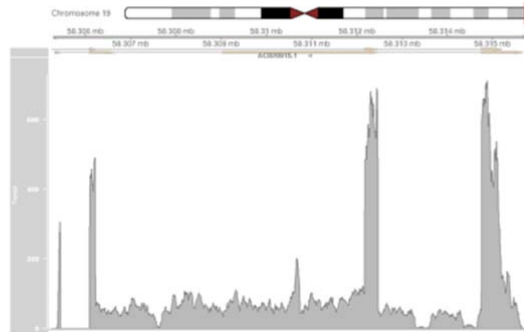

67

**OTTHUMG00000032333 - Adipose**

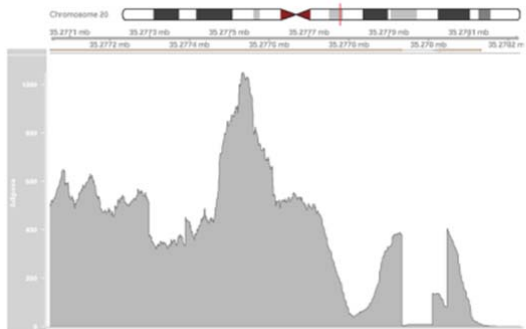

**OTTHUMG00000188075**

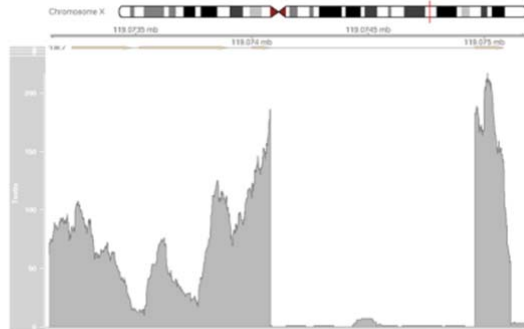

**OTTHUMG00000014438 - Fallopian tube**

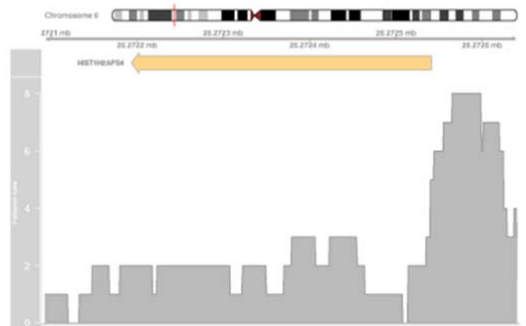

**OTTHUMG00000019158 - Cerebral cortex**

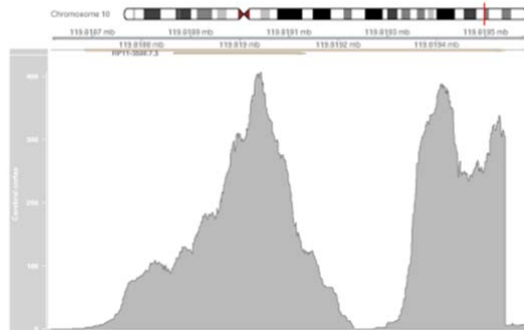

68

**OTTHUMG00000021284 - Testis**

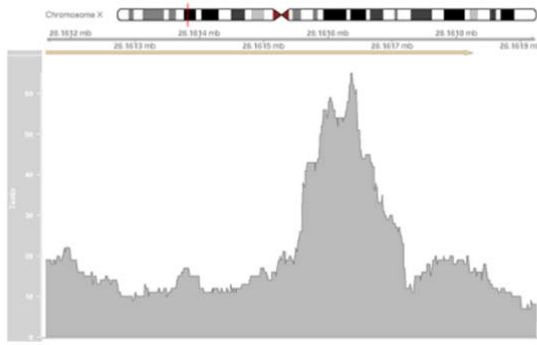

**OTTHUMG00000191553 - Testis**

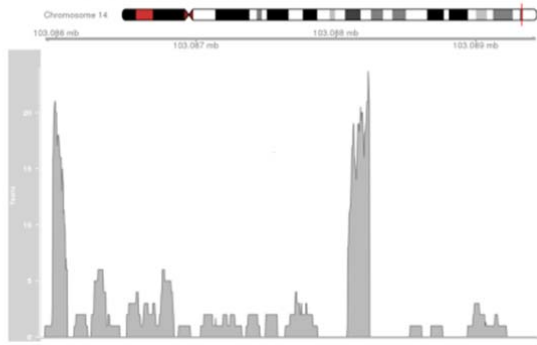

**OTTHUMG00000067448 - Cerebral cortex**

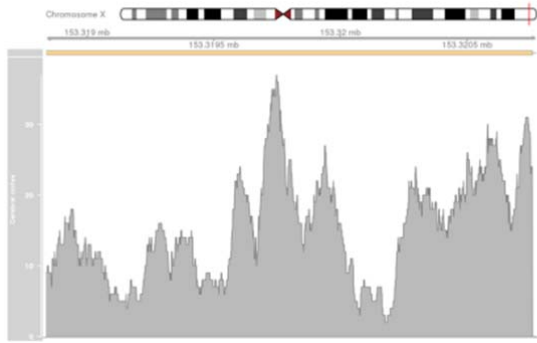

**OTTHUMG00000179794 - Spleen**

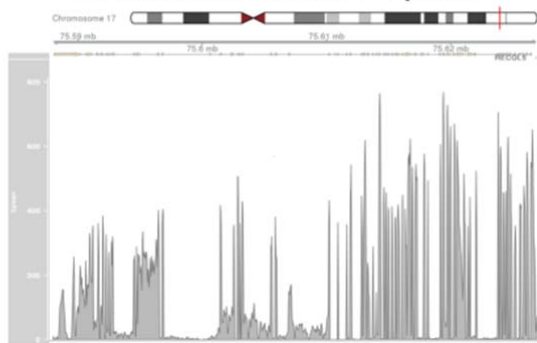

69

**OTTHUMG00000022468 - Cerebral cortex**

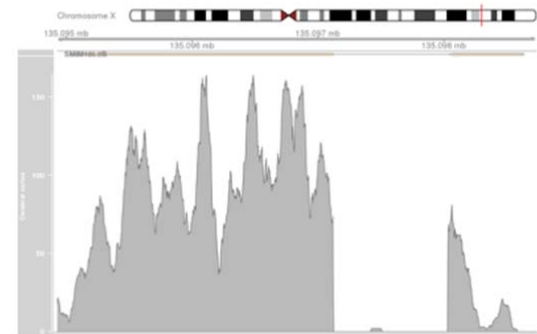

**OTTHUMG00000007539 - Tonsil**

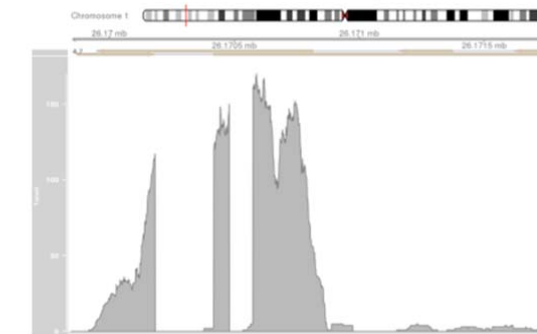

**OTTHUMG00000167731 - Testis**

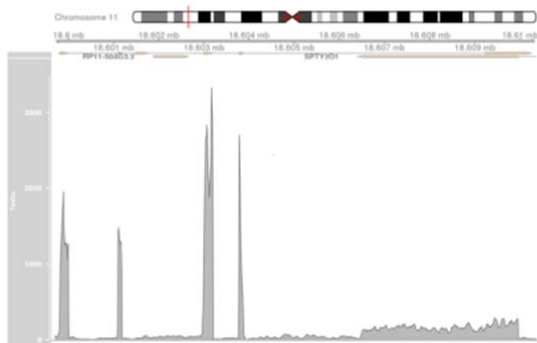

**OTTHUMG00000158324 - Spleen**

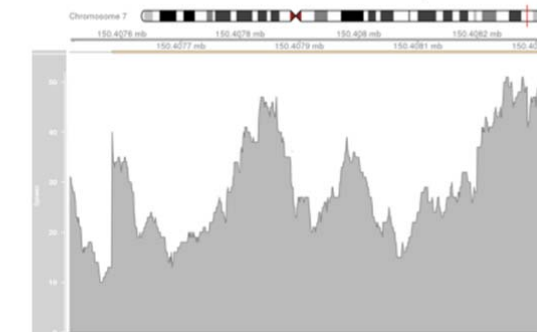

70

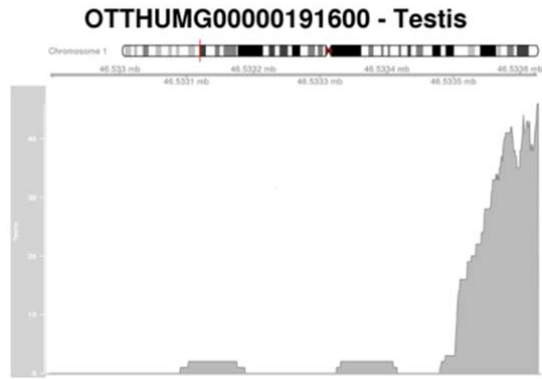

71

72

73 **Supplementary figure 3: Tissue Specific Transcript Coverage Plots for Novel Protein Coding Genes.**

74 These plots depict tissue specific mapping of transcript data from ArrayExpress dataset E-MTAB-

75 2816 [30], against each of the novel protein coding regions discovered in this study. The x-axis of

76 each plot corresponds to the highlighted region of the genome in which the novel protein is located.

77 The y-axis shows the number of paired reads mapping at this loci.

78

79

80

81

82

83

84

85

86

87

88

89

90

91

92

93

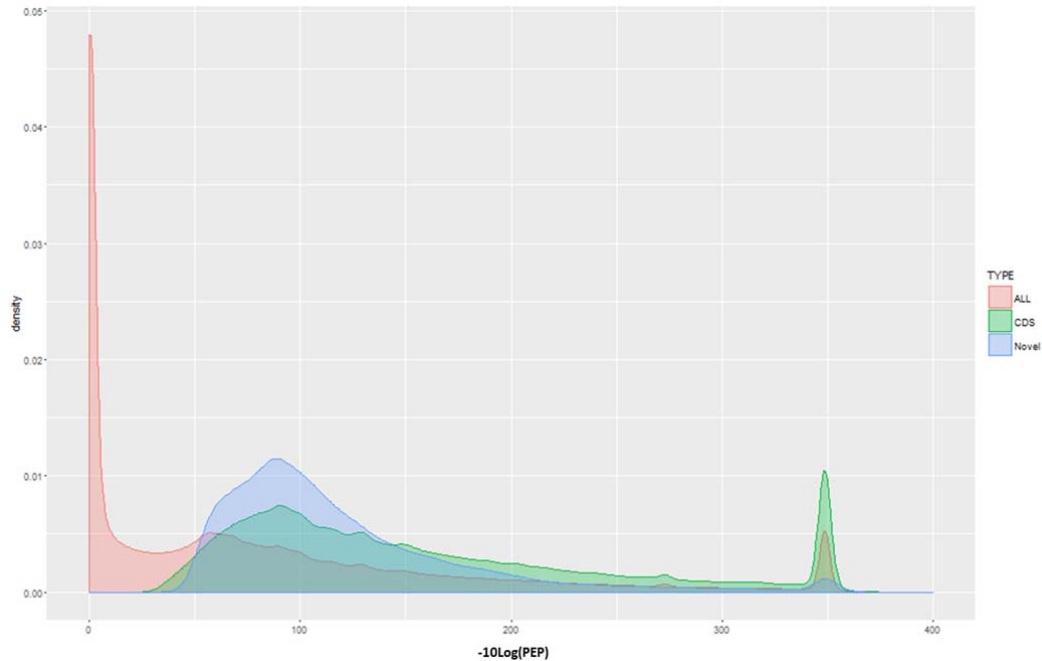

94

95 **Supplementary figure 4: PSM Density Plot** - This plot depicts the density distribution of PSMs based  
 96 upon their  $-10 \cdot \log(\text{Posterior Error Probability})$  values. The overall distribution is shown in red, the  
 97 PSMs matching known coding sequences are in green and the PSMs identified as novel are shown in  
 98 blue. Note that a score of 13 represents a PEP of about 0.05 and 20 represents a PEP of 0.01. Nearly  
 99 all the novel and the majority of the CDS identifications are above a score of 50 which represents a  
 100 PEP of 0.00001. There is a peak in the score at around 350 (PEP =  $10^{-35}$ ) we believe this is to be an  
 101 artefact for the Percolation where the probability of a PSM being incorrect is very close to 0.

102

103

104

105

106

107

108

109

110

111

112

113

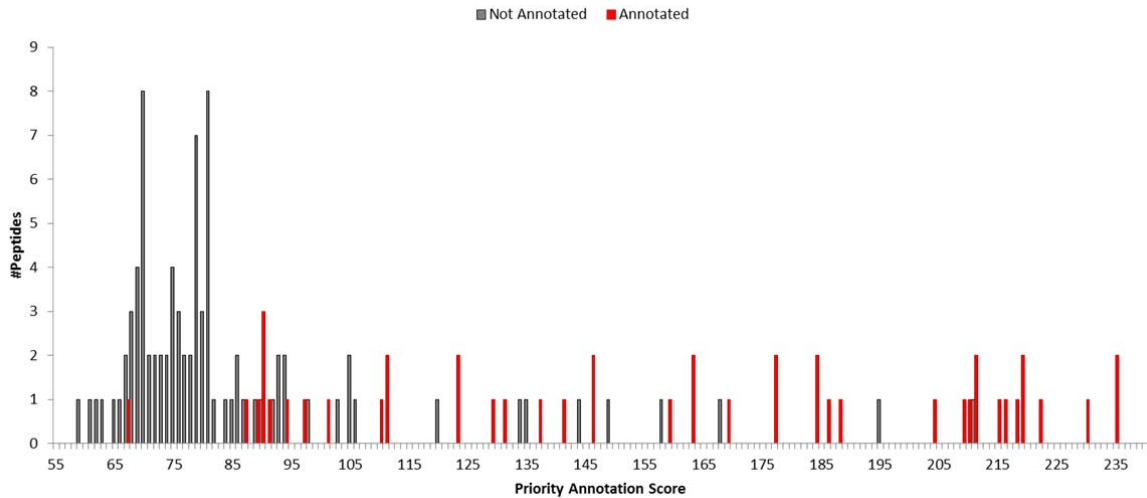

114

115 **Supplementary figure 5: Peptide Priority Annotation Score Histogram** – The x-axis of this plot  
 116 represents the binned priority annotation score of novel peptides identified in this study, and the y-  
 117 axis is the number of unique peptides in each scoring bin. The novel peptides that did not lead to a  
 118 new GENCODE annotation are shown in grey and the peptides which have given rise to novel protein  
 119 coding genes are shown in red. Peptides mapping to pseudogenes have been excluded due to the  
 120 confounding and ambiguous nature of their annotation. A trend can be seen in this histogram where  
 121 peptides that achieved a greater priority annotation score are much more likely to lead to a novel  
 122 annotation after manual genome inspection and incorporation of further evidence streams. It should  
 123 also be noted that the very low scoring peptides that did lead to annotation are from multi-peptide  
 124 proteins which contained additional higher scoring peptides.

125

126

127

128

129

130

131

132

133

134

135

136



137 **Supplemental dataset 1: Novel Identifications.** This table, made up of four sheets, contains a lists of  
138 inferred novel (non-CDS) proteins, peptides, PSMs and the final set of validated novel protein coding  
139 genes. Included in the protein tables are the match genomic loci, GENCODE VEGA identifiers,  
140 annotation notes, peptides matched, and tissues in which these peptides were seen. Additionally  
141 these tables also highlight which of these proteins have any further supporting proteomic evidence  
142 in the January 2016 release of PeptideAtlas. The table also contains the results from mapping tissue  
143 specific transcriptomic RNAseq data to the same locus. An RPKM above 0.75 is considered to show  
144 significant transcript expression at these loci. The peptide table gives more detail on individual  
145 peptides, including annotation score, best PEP, number of modified and unmodified PSMs,  
146 modification types, number of samples significantly identifying peptide and the list of tissues for  
147 these samples. The final sheet contains a list of the significant PSMs identifying the non-CDS  
148 peptides. This table shows the identification and scoring for the multiple search engines, the  
149 spectrum mzML ID, any modifications found in the spectra, and spectral charge state.

150

151

152

153

154

155

156

157

158

159

160

161

162

163

164

165

166

167

168

| Name                  | Description                           | Genome | NA Sequences | Proteins / ORFs | AminoAcids |
|-----------------------|---------------------------------------|--------|--------------|-----------------|------------|
| Caltech Cufflinks     | RNAseq transcripts                    | GRCh37 | 21789        | 2629390         | 74931806   |
| UniProt               | UniProt Complete Human Proteome       | na     | na           | 88708           | 35125351   |
| Gencode CDS           | GENCODE 20 Protein Coding Transcripts | GRCh38 | na           | 93246           | 34827847   |
| Gencode lncRNA        | Long non-coding RNA genes             | GRCh38 | 24460        | 704224          | 20081370   |
| Gencode 5'UTR         | 5'UTR sequences for GENCODE CDS genes | GRCh38 | 59348        | 255141          | 7470191    |
| Gencode PseudoGenes   | GENCODE 20 Pseudogenes                | GRCh38 | 10444        | 206225          | 6422183    |
| Yale Pseudogenes      | Pseudogene.org Sequences              | GRCh37 | 6011         | 126160          | 3674056    |
| Mit Scripture BodyMap | RNAseq transcripts                    | GRCh37 | 12206        | 73432           | 1812832    |
| Ensembl BodyMap       | RNAseq data from 16 different tissues | GRCh38 | na           | 10280           | 1515295    |
| AUGUSTUS              | Additional gene predictions           | GRCh38 | na           | 6317            | 1250673    |
| Contaminates          | Standard list of contaminate proteins | na     | na           | 247             | 130626     |
|                       |                                       |        |              |                 |            |
| Decoy Database        | Shuffled target sequences             | na     | na           | 4193370         | 187242230  |

169

170

171 **Supplemental table 1: Search Database Components.** This table summarises the sequence sources  
172 used to create the sequence databases searched using mass spectrometry data. Several of the non-  
173 protein coding and RNAseq transcripts were 3 frame translated and divided at stop codons into open  
174 reading frames ORFs.
